# Supplementary material for: Mid-Arm Muscle Circumference or Body Weight-Standardized Hand Grip Strength in the GLIM Superiorly Predicts Survival in Chinese Colorectal Cancer Patients
Source: MDPI journal article supplement (doi:10.3390/nu14235166), 2022-12-05
Supplement: s1 [file s1]

**Supplementary Materials:**

**Table S1.** Inclusion and Exclusion Criteria for the INSCOC Projecta

| Criteria type | Description                                                                                                                                                                                                                                                                                                                                                                                                                                                                                                                        |
|---------------|------------------------------------------------------------------------------------------------------------------------------------------------------------------------------------------------------------------------------------------------------------------------------------------------------------------------------------------------------------------------------------------------------------------------------------------------------------------------------------------------------------------------------------|
| Inclusion     | 1) Age at least 18 years;<br>2) With length of hospital stay longer than 48 hours;<br>3) Diagnosed with one of the following 18 types of locally or metastatic malignant tumors: lung cancer, gastric cancer, liver cancer, colorectal cancer, breast cancer, esophageal cancer, cervical cancer, endometrial cancer, nasopharyngeal carcinoma, malignant lymphoma, leukemia, pancreatic cancer, ovarian cancer, prostate cancer, bladder cancer, brain tumors, biliary tract malignant tumors and gastrointestinal stromal tumors |
| Exclusion     | 1) With organ transplantation;<br>2) Pregnant woman;<br>3) Diagnosed with HIV infection or AIDS;<br>4) Admitted to the ICU at the beginning of recruitment.<br>5) If patients were hospitalized more than two times during investigation, only the data from the first survey were included                                                                                                                                                                                                                                        |

INSCOC, Investigation on Nutrition Status and its Clinical Outcome of Common Cancers ([chictr.org.cn](http://chictr.org.cn): ChiCTR1800020329).

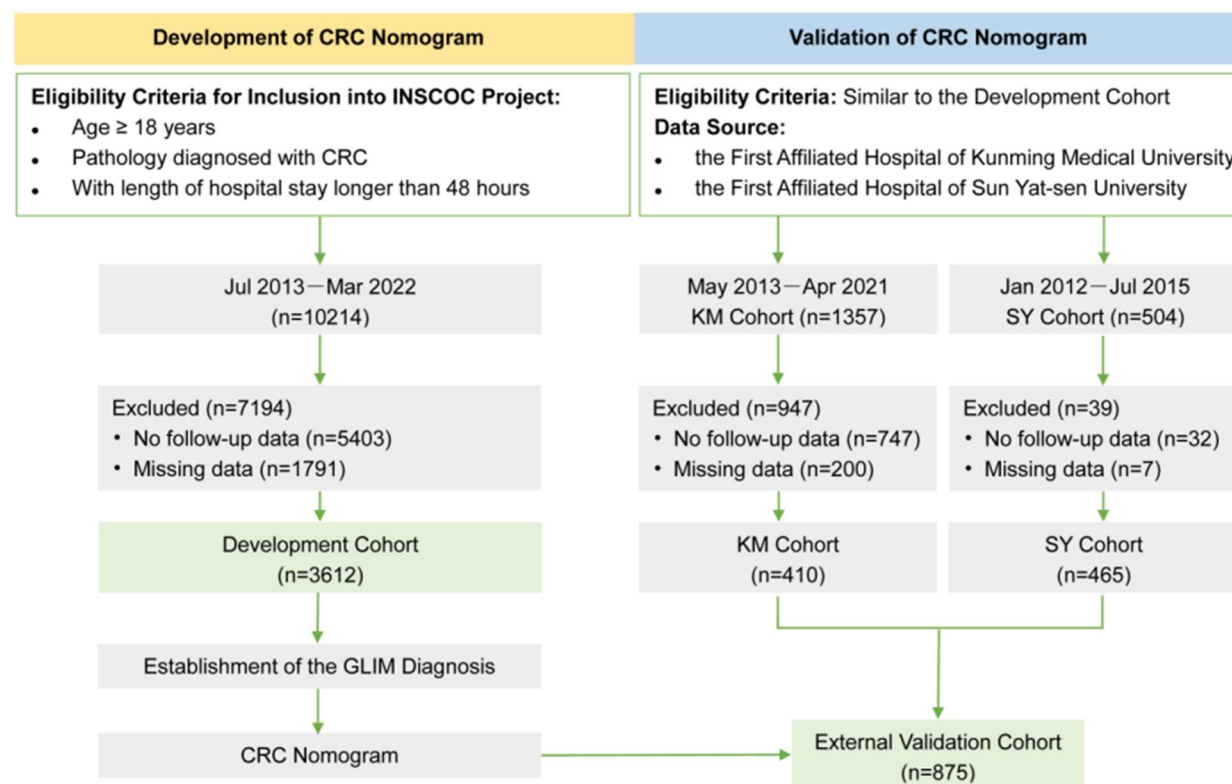

**Figure S1.** Overview and design of the study. CRC, colorectal cancer; INSCOC, the Investigation on Nutrition Status and its Clinical Outcome of Common Cancers; GLIM, the Global Leadership Initiative on Malnutrition.

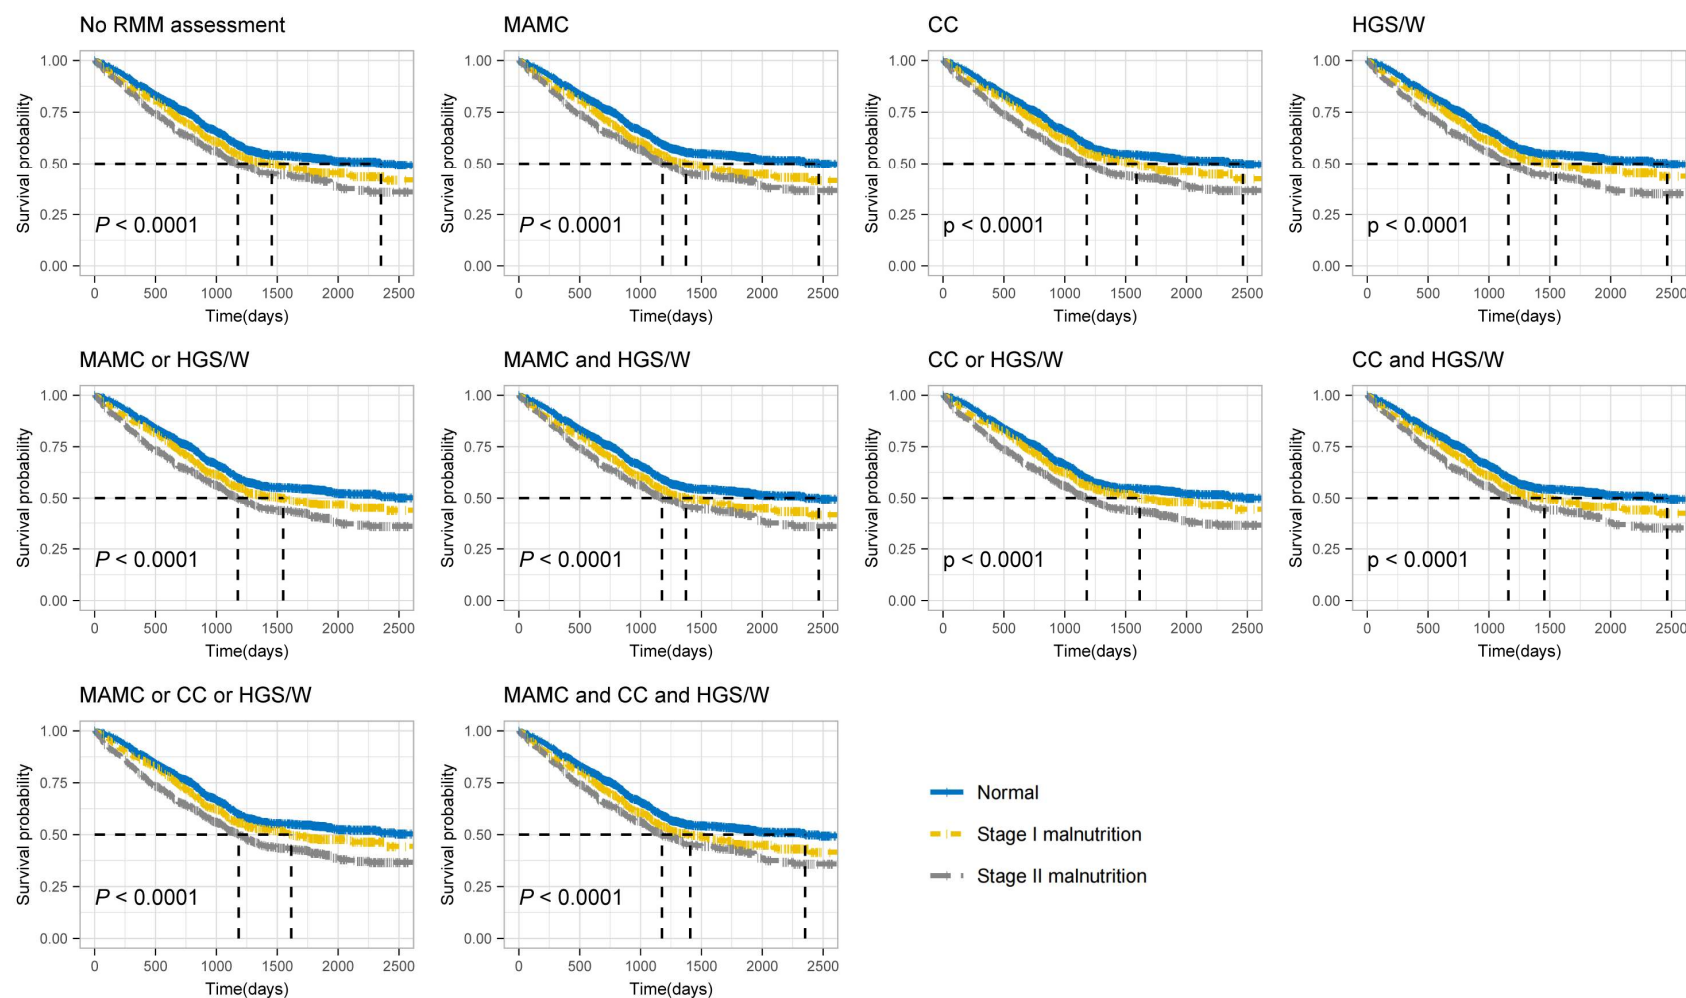

**Figure S2.** Kaplan-Meier curve analyses on the association between GLIM diagnosed malnutrition based on different RMM assessment and survival. GLIM, Global Leadership Initiative on Malnutrition; RMM, reduced muscle mass; MAMC, midarm muscle circumference; CC, calf circumference; HGS/W, hand grip strength/weight; \*For no RMM assessment, only weight loss and body mass index were evaluated as phenotypic criteria for establishing the GLIM diagnosis.

**Table S2.** Detailed Baseline Characteristics of the development and validation cohort.

| Characteristics             | Development cohort |                          |                        | <i>P</i> | Validation cohort |                          |                        | <i>P</i> |
|-----------------------------|--------------------|--------------------------|------------------------|----------|-------------------|--------------------------|------------------------|----------|
|                             | Normal             | Moderate<br>malnutrition | Severe<br>malnutrition |          | Normal            | Moderate<br>malnutrition | Severe<br>malnutrition |          |
|                             | (n=1892)           | (n=947)                  | (n=773)                |          | (n=402)           | (n=242)                  | (n=231)                |          |
| <i>General information</i>  |                    |                          |                        |          |                   |                          |                        |          |
| Age, years, mean±SD         | 63.12±11.95        | 64.80±12.63              | 65.58±13.20            | <0.001   | 62.35±12.22       | 65.73±11.64              | 66.73±14.43            | <0.001   |
| Sex, male, n (%)            | 1125 (59.5)        | 564 (59.6)               | 484 (62.6)             | 0.291    | 234 (58.2)        | 147 (60.7)               | 134 (58.0)             | 0.781    |
| Smoking, yes, n (%)         | 684 (36.2)         | 364 (38.4)               | 313 (40.5)             | 0.095    | 143 (35.6)        | 111 (45.9)               | 94 (40.7)              | 0.033    |
| Alcohol drinker, yes, n (%) | 348 (18.4)         | 181 (19.1)               | 151 (19.5)             | 0.765    | 42 (10.4)         | 37 (15.3)                | 31 (13.4)              | 0.180    |
| Tea consumption, yes, n (%) | 448 (23.7)         | 214 (22.6)               | 161 (20.8)             | 0.278    | 137 (34.1)        | 89 (36.8)                | 88 (38.1)              | 0.564    |
| Residence, n (%)            |                    |                          |                        | 0.215    |                   |                          |                        | 0.925    |
| Capital city                | 584 (30.9)         | 295 (31.2)               | 242 (31.3)             |          | 107 (26.6)        | 68 (28.1)                | 72 (31.2)              |          |
| Prefecture level cities     | 399 (21.1)         | 184 (19.4)               | 168 (21.7)             |          | 112 (27.9)        | 68 (28.1)                | 63 (27.3)              |          |
| County-level city           | 562 (29.7)         | 280 (29.6)               | 196 (25.4)             |          | 70 (17.4)         | 39 (16.1)                | 39 (16.9)              |          |
| Rural areas                 | 347 (18.3)         | 188 (19.9)               | 167 (21.6)             |          | 113 (28.1)        | 67 (27.7)                | 57 (24.7)              |          |
| Education, n (%)            |                    |                          |                        | <0.001   |                   |                          |                        | 0.197    |
| Primary school and below    | 439 (23.2)         | 303 (32.0)               | 227 (29.4)             |          | 97 (24.1)         | 76 (31.4)                | 69 (29.9)              |          |
| Junior middle school        | 559 (29.5)         | 254 (26.8)               | 217 (28.1)             |          | 165 (41.0)        | 91 (37.6)                | 88 (38.1)              |          |
| Senior high school          | 530 (28.0)         | 222 (23.4)               | 198 (25.6)             |          | 75 (18.7)         | 50 (20.7)                | 46 (19.9)              |          |
| University degree or above  | 364 (19.2)         | 168 (17.7)               | 131 (16.9)             |          | 65 (16.2)         | 25 (10.3)                | 28 (12.1)              |          |
| Occupation, n (%)           |                    |                          |                        | 0.194    |                   |                          |                        | 0.096    |
| Staff                       | 303 (16.0)         | 121 (12.8)               | 101 (13.1)             |          | 105 (26.1)        | 77 (31.8)                | 62 (26.8)              |          |
| Worker                      | 86 (4.5)           | 47 (5.0)                 | 36 (4.7)               |          | 211 (52.5)        | 123 (50.8)               | 130 (56.3)             |          |
| Farmer                      | 381 (20.1)         | 216 (22.8)               | 167 (21.6)             |          | 64 (15.9)         | 22 (9.1)                 | 26 (11.3)              |          |
| Retirees and others         | 1122 (59.3)        | 563 (59.5)               | 469 (60.7)             |          | 22 (5.5)          | 20 (8.3)                 | 13 (5.6)               |          |
| Marital status, n (%)       |                    |                          |                        | 0.488    |                   |                          |                        | 0.878    |
| Married                     | 1529 (80.8)        | 769 (81.2)               | 640 (82.8)             |          | 375 (93.3)        | 225 (93.0)               | 213 (92.2)             |          |
| Single                      | 363 (19.2)         | 178 (18.8)               | 133 (17.2)             |          | 27 (6.7)          | 17 (7.0)                 | 18 (7.8)               |          |

|                                           |             |            |            |       |            |            |            |       |
|-------------------------------------------|-------------|------------|------------|-------|------------|------------|------------|-------|
| Nationality, n (%)                        |             |            |            | 0.145 |            |            |            | 0.647 |
| Han                                       | 1667 (88.1) | 863 (91.1) | 698 (90.3) |       | 388 (96.5) | 235 (97.1) | 223 (96.5) |       |
| Mongolian                                 | 17 (0.9)    | 6 (0.6)    | 4 (0.5)    |       | 0 (0.0)    | 1 (0.4)    | 0 (0.0)    |       |
| Zhuang                                    | 24 (1.3)    | 6 (0.6)    | 14 (1.8)   |       | 13 (3.2)   | 6 (2.5)    | 8 (3.5)    |       |
| Manchu                                    | 22 (1.2)    | 9 (1.0)    | 7 (0.9)    |       | 1 (0.2)    | 0 (0.0)    | 0 (0.0)    |       |
| Other ethnic groups                       | 162 (8.6)   | 63 (6.7)   | 50 (6.5)   |       | 0 (0.0)    | 0 (0.0)    | 0 (0.0)    |       |
| <b><i>Chronic disease history</i></b>     |             |            |            |       |            |            |            |       |
| Liver cirrhosis, yes, n (%)               | 5 (0.3)     | 3 (0.3)    | 2 (0.3)    | 0.963 | 0 (0.0)    | 0 (0.0)    | 0 (0.0)    | NA    |
| Chronic hepatitis, yes, n (%)             | 50 (2.6)    | 34 (3.6)   | 25 (3.2)   | 0.351 | 5 (1.2)    | 5 (2.1)    | 5 (2.2)    | 0.611 |
| Stroke, yes, n (%)                        | 12 (0.6)    | 8 (0.8)    | 4 (0.5)    | 0.689 | 3 (0.7)    | 2 (0.8)    | 1 (0.4)    | 0.857 |
| COPD, yes, n (%)                          | 9 (0.5)     | 9 (1.0)    | 12 (1.6)   | 0.019 | 1 (0.2)    | 4 (1.7)    | 5 (2.2)    | 0.063 |
| Myocardial infarction, yes, n (%)         | 7 (0.4)     | 3 (0.3)    | 1 (0.1)    | 0.591 | 3 (0.7)    | 4 (1.7)    | 0 (0.0)    | 0.129 |
| Received dialysis therapy, yes, n (%)     | 2 (0.1)     | 0 (0.0)    | 1 (0.1)    | 0.576 | 0 (0.0)    | 0 (0.0)    | 0 (0.0)    | NA    |
| Diabetes, yes, n (%)                      | 197 (10.4)  | 74 (7.8)   | 78 (10.1)  | 0.079 | 26 (6.5)   | 24 (9.9)   | 15 (6.5)   | 0.222 |
| Hypertension, yes, n (%)                  | 383 (20.2)  | 197 (20.8) | 146 (18.9) | 0.600 | 74 (18.4)  | 57 (23.6)  | 48 (20.8)  | 0.290 |
| Coronary disease, yes, n (%)              | 69 (3.6)    | 41 (4.3)   | 36 (4.7)   | 0.424 | 8 (2.0)    | 15 (6.2)   | 8 (3.5)    | 0.020 |
| Anemia, yes, n (%)                        | 54 (2.9)    | 23 (2.4)   | 33 (4.3)   | 0.068 | 10 (2.5)   | 13 (5.4)   | 20 (8.7)   | 0.002 |
| Hyperthyroidism, yes, n (%)               | 9 (0.5)     | 9 (1.0)    | 6 (0.8)    | 0.310 | 0 (0.0)    | 1 (0.4)    | 2 (0.9)    | 0.195 |
| Hypothyroidism, yes, n (%)                | 7 (0.4)     | 4 (0.4)    | 1 (0.1)    | 0.529 | 0 (0.0)    | 1 (0.4)    | 0 (0.0)    | 0.270 |
| Chronic pancreatitis, yes, n (%)          | 2 (0.1)     | 1 (0.1)    | 1 (0.1)    | 0.985 | 0 (0.0)    | 0 (0.0)    | 1 (0.4)    | 0.248 |
| Osteoporosis, yes, n (%)                  | 12 (0.6)    | 10 (1.1)   | 8 (1.0)    | 0.394 | 5 (1.2)    | 4 (1.7)    | 7 (3.0)    | 0.264 |
| Ulcerative colitis, yes, n (%)            | 25 (1.3)    | 12 (1.3)   | 11 (1.4)   | 0.961 | 1 (0.2)    | 1 (0.4)    | 0 (0.0)    | 0.638 |
| Intestinal Crohn disease, yes, n (%)      | 2 (0.1)     | 1 (0.1)    | 0 (0.0)    | 0.664 | 0 (0.0)    | 0 (0.0)    | 0 (0.0)    | NA    |
| Chronic biliary disease, yes, n (%)       | 69 (3.6)    | 26 (2.7)   | 23 (3.0)   | 0.389 | 7 (1.7)    | 1 (0.4)    | 7 (3.0)    | 0.090 |
| Chronic kidney disease, yes, n (%)        | 4 (0.2)     | 3 (0.3)    | 2 (0.3)    | 0.867 | 0 (0.0)    | 0 (0.0)    | 0 (0.0)    | NA    |
| Tuberculosis, yes, n (%)                  | 8 (0.4)     | 4 (0.4)    | 1 (0.1)    | 0.482 | 0 (0.0)    | 0 (0.0)    | 0 (0.0)    | NA    |
| <b><i>Hospitalization information</i></b> |             |            |            |       |            |            |            |       |
| Family cancer history, yes, n (%)         | 297 (15.7)  | 145 (15.3) | 119 (15.4) | 0.958 | 40 (10.0)  | 37 (15.3)  | 37 (16.0)  | 0.043 |

|                                            |             |            |            |        |            |            |            |       |
|--------------------------------------------|-------------|------------|------------|--------|------------|------------|------------|-------|
| TNM Stage, n (%)                           |             |            |            | 0.937  |            |            |            | 0.001 |
| I                                          | 113 (6.0)   | 58 (6.1)   | 41 (5.3)   |        | 66 (16.4)  | 27 (11.2)  | 29 (12.6)  |       |
| II                                         | 502 (26.5)  | 236 (24.9) | 204 (26.4) |        | 108 (26.9) | 81 (33.5)  | 51 (22.1)  |       |
| III                                        | 764 (40.4)  | 400 (42.2) | 318 (41.1) |        | 158 (39.3) | 94 (38.8)  | 83 (35.9)  |       |
| IV                                         | 513 (27.1)  | 253 (26.7) | 210 (27.2) |        | 70 (17.4)  | 40 (16.5)  | 68 (29.4)  |       |
| Organ metastasis, n (%)                    |             |            |            | 0.371  |            |            |            | 0.022 |
| 0                                          | 1343 (71.0) | 673 (71.1) | 549 (71.0) |        | 6 (1.5)    | 5 (2.1)    | 13 (5.6)   |       |
| 1                                          | 347 (18.3)  | 154 (16.3) | 125 (16.2) |        | 361 (89.8) | 221 (91.3) | 194 (84.0) |       |
| 2                                          | 97 (5.1)    | 59 (6.2)   | 43 (5.6)   |        | 31 (7.7)   | 12 (5.0)   | 18 (7.8)   |       |
| ≥3                                         | 105 (5.5)   | 61 (6.4)   | 56 (7.2)   |        | 4 (1.0)    | 4 (1.7)    | 6 (2.6)    |       |
| Differentiation grade, n (%)               |             |            |            | 0.017  |            |            |            | 0.294 |
| Well                                       | 81 (4.3)    | 33 (3.5)   | 27 (3.5)   |        | 293 (72.9) | 163 (67.4) | 159 (68.8) |       |
| Moderate                                   | 1494 (79.0) | 712 (75.2) | 585 (75.7) |        | 73 (18.2)  | 61 (25.2)  | 52 (22.5)  |       |
| Poor                                       | 317 (16.8)  | 202 (21.3) | 161 (20.8) |        | 36 (9.0)   | 18 (7.4)   | 20 (8.7)   |       |
| Radical resection, yes, n (%)              | 1211 (64.0) | 615 (64.9) | 505 (65.3) | 0.774  | 188 (46.8) | 84 (34.7)  | 96 (41.6)  | 0.011 |
| Palliative resection, yes, n (%)           | 95 (5.0)    | 50 (5.3)   | 54 (7.0)   | 0.123  | 7 (1.7)    | 3 (1.2)    | 10 (4.3)   | 0.049 |
| Complication of surgery, yes, n (%)        | 32 (1.7)    | 25 (2.6)   | 16 (2.1)   | 0.237  | 0 (0.0)    | 2 (0.8)    | 2 (0.9)    | 0.181 |
| Neoadjuvant radiotherapy, yes, n (%)       | 19 (1.0)    | 14 (1.5)   | 16 (2.1)   | 0.091  | 6 (1.5)    | 5 (2.1)    | 4 (1.7)    | 0.863 |
| Preoperative chemoradiotherapy, yes, n (%) | 22 (1.2)    | 14 (1.5)   | 19 (2.5)   | 0.046  | 7 (1.7)    | 1 (0.4)    | 2 (0.9)    | 0.276 |
| Adjuvant radiotherapy, yes, n (%)          | 79 (4.2)    | 32 (3.4)   | 23 (3.0)   | 0.272  | 5 (1.2)    | 1 (0.4)    | 6 (2.6)    | 0.119 |
| Curative radiotherapy, yes, n (%)          | 39 (2.1)    | 18 (1.9)   | 19 (2.5)   | 0.713  | 7 (1.7)    | 5 (2.1)    | 2 (0.9)    | 0.555 |
| Concurrent chemoradiotherapy, yes, n (%)   | 45 (2.4)    | 19 (2.0)   | 14 (1.8)   | 0.613  | 4 (1.0)    | 2 (0.8)    | 0 (0.0)    | 0.328 |
| Neoadjuvant chemotherapy, yes, n (%)       | 37 (2.0)    | 22 (2.3)   | 24 (3.1)   | 0.199  | 7 (1.7)    | 5 (2.1)    | 2 (0.9)    | 0.555 |
| Adjuvant chemotherapy, yes, n (%)          | 725 (38.3)  | 322 (34.0) | 257 (33.2) | 0.014  | 87 (21.6)  | 31 (12.8)  | 45 (19.5)  | 0.019 |
| Chemotherapy for metastasis, yes, n (%)    | 201 (10.6)  | 61 (6.4)   | 59 (7.6)   | <0.001 | 3 (0.7)    | 4 (1.7)    | 0 (0.0)    | 0.129 |
| Curative chemotherapy, yes, n (%)          | 207 (10.9)  | 94 (9.9)   | 79 (10.2)  | 0.675  | 20 (5.0)   | 8 (3.3)    | 11 (4.8)   | 0.589 |
| Targeted therapy, yes, n (%)               | 100 (5.3)   | 46 (4.9)   | 27 (3.5)   | 0.144  | 1 (0.2)    | 1 (0.4)    | 3 (1.3)    | 0.224 |
| Immune therapy, yes, n (%)                 | 62 (3.3)    | 11 (1.2)   | 6 (0.8)    | <0.001 | 0 (0.0)    | 1 (0.4)    | 0 (0.0)    | 0.270 |

|                                              |             |             |             |        |               |               |               |        |
|----------------------------------------------|-------------|-------------|-------------|--------|---------------|---------------|---------------|--------|
| Embolization therapy, yes, n (%)             | 11 (0.6)    | 4 (0.4)     | 6 (0.8)     | 0.631  | 0 (0.0)       | 1 (0.4)       | 2 (0.9)       | 0.195  |
| Radio frequency ablation therapy, yes, n (%) | 25 (1.3)    | 8 (0.8)     | 6 (0.8)     | 0.334  | 0 (0.0)       | 0 (0.0)       | 2 (0.9)       | 0.061  |
| Cryotherapy, yes, n (%)                      | 5 (0.3)     | 4 (0.4)     | 1 (0.1)     | 0.510  | 0 (0.0)       | 0 (0.0)       | 0 (0.0)       | NA     |
| Thermotherapy, yes, n (%)                    | 5 (0.3)     | 3 (0.3)     | 5 (0.6)     | 0.316  | 0 (0.0)       | 0 (0.0)       | 0 (0.0)       | NA     |
| Symptomatic therapy, yes, n (%)              | 742 (39.2)  | 374 (39.5)  | 283 (36.6)  | 0.390  | 34 (8.5)      | 24 (9.9)      | 13 (5.6)      | 0.219  |
| Maintenance chemotherapy, yes, n (%)         | 10 (0.5)    | 9 (1.0)     | 10 (1.3)    | 0.112  | 6 (1.5)       | 3 (1.2)       | 3 (1.3)       | 0.959  |
| Length of hospital stay, days, mean±SD       | 12.64±10.10 | 14.54±12.33 | 13.99±11.39 | <0.001 | 13.78 (10.73) | 15.69 (10.91) | 15.84 (11.20) | 0.028  |
| ICU stay, yes, n (%)                         | 246 (13.0)  | 188 (19.9)  | 124 (16.0)  | <0.001 | 0 (0.0)       | 2 (0.8)       | 4 (1.7)       | 0.038  |
| Cost, 1000 RMB yuan, mean±SD                 | 30.03±36.84 | 34.05±32.64 | 31.76±31.77 | 0.014  | 29.41 (23.46) | 35.13 (25.20) | 34.70 (27.66) | 0.005  |
| KPS score, mean±SD                           | 88.39±10.97 | 84.37±14.69 | 81.11±17.00 | <0.001 | 90.40 (8.87)  | 84.75 (14.15) | 82.29 (14.49) | <0.001 |
| <b><i>Nutrition-related information</i></b>  |             |             |             |        |               |               |               |        |
| Height, cm, mean±SD                          | 164.76±8.08 | 164.00±8.11 | 164.21±8.40 | 0.044  | 162.17 (8.53) | 160.98 (8.09) | 160.57 (8.52) | 0.046  |
| Weight, kg, mean±SD                          | 63.93±10.14 | 59.24±10.60 | 55.35±11.08 | <0.001 | 61.28 (9.32)  | 57.42 (10.28) | 52.34 (10.23) | <0.001 |
| Weight one month ago, kg, mean±SD            | 64.07±10.33 | 61.73±11.57 | 59.10±12.47 | <0.001 | 61.54 (9.57)  | 59.73 (11.03) | 56.18 (11.49) | <0.001 |
| Weight six months ago, kg, mean±SD           | 65.54±10.57 | 63.53±11.64 | 62.07±12.16 | <0.001 | 62.75 (10.00) | 61.19 (11.03) | 59.41 (12.26) | 0.001  |
| BMI, kg/m <sup>2</sup> , mean±SD             | 23.48±2.83  | 21.97±3.26  | 20.45±3.45  | <0.001 | 23.26 (2.78)  | 22.10 (3.29)  | 20.26 (3.34)  | <0.001 |
| BMI, categorical, n (%)                      |             |             |             | <0.001 |               |               |               | <0.001 |
| Underweight (<18.5 kg/m <sup>2</sup> )       | 9 (0.5)     | 145 (15.3)  | 246 (31.8)  |        | 1 (0.2)       | 40 (16.5)     | 76 (32.9)     |        |
| Normal (18.5-23.9, kg/m <sup>2</sup> )       | 1143 (60.4) | 573 (60.5)  | 414 (53.6)  |        | 255 (63.4)    | 137 (56.6)    | 125 (54.1)    |        |
| Overweight (24-27.9, kg/m <sup>2</sup> )     | 615 (32.5)  | 195 (20.6)  | 97 (12.5)   |        | 121 (30.1)    | 54 (22.3)     | 27 (11.7)     |        |
| Obesity (≥28 kg/m <sup>2</sup> )             | 125 (6.6)   | 34 (3.6)    | 16 (2.1)    |        | 25 (6.2)      | 11 (4.5)      | 3 (1.3)       |        |
| Mid-arm circumference, cm, mean±SD           | 27.32±3.18  | 25.97±3.05  | 24.44±3.88  | <0.001 | 26.56 (2.92)  | 25.70 (3.16)  | 23.67 (3.54)  | <0.001 |
| Triceps skinfold thickness, mm, mean±SD      | 17.52±7.78  | 16.12±7.44  | 15.14±8.78  | <0.001 | 16.65 (8.64)  | 17.13 (9.11)  | 14.59 (9.77)  | 0.005  |
| Mid-arm muscle circumference, cm, mean±SD    | 21.82±3.33  | 20.91±3.03  | 19.69±3.85  | <0.001 | 21.33 (3.04)  | 20.32 (3.08)  | 19.09 (3.84)  | <0.001 |
| Hand grip strength, kg, mean±SD              | 27.67±9.69  | 24.24±9.34  | 21.79±10.63 | <0.001 | 32.63 (16.36) | 28.16 (16.39) | 21.74 (14.68) | <0.001 |
| Hand grip strength/weight ratio, mean±SD     | 0.43±0.14   | 0.41±0.14   | 0.40±0.18   | <0.001 | 0.53 (0.24)   | 0.48 (0.25)   | 0.41 (0.26)   | <0.001 |
| Calf circumference, cm, mean±SD              | 33.83±4.14  | 32.32±3.68  | 30.96±4.21  | <0.001 | 33.81 (3.46)  | 32.60 (3.28)  | 30.76 (3.29)  | <0.001 |
| PGSGA score, ≥4, n (%)                       | 638 (33.7)  | 896 (94.6)  | 740 (95.7)  | <0.001 | 170 (42.3)    | 229 (94.6)    | 222 (96.1)    | <0.001 |

|                                                      |                    |                    |                     |        |                    |                     |                     |        |
|------------------------------------------------------|--------------------|--------------------|---------------------|--------|--------------------|---------------------|---------------------|--------|
| NRS2002 score, $\geq 3$ , n (%)                      | 169 (8.9)          | 539 (56.9)         | 496 (64.2)          | <0.001 | 73 (18.2)          | 172 (71.1)          | 190 (82.3)          | <0.001 |
| Parenteral nutritional support, yes, n (%)           | 474 (25.1)         | 291 (30.7)         | 296 (38.3)          | <0.001 | 102 (25.4)         | 75 (31.0)           | 82 (35.5)           | 0.023  |
| Enteral nutritional support, yes, n (%)              | 558 (29.5)         | 336 (35.5)         | 323 (41.8)          | <0.001 | 99 (24.6)          | 73 (30.2)           | 82 (35.5)           | 0.013  |
| No nutritional support, yes, n (%)                   | 1252 (66.2)        | 557 (58.8)         | 395 (51.1)          | <0.001 | 267 (66.4)         | 144 (59.5)          | 127 (55.0)          | 0.013  |
| <b>Laboratory findings</b>                           |                    |                    |                     |        |                    |                     |                     |        |
| Total protein, g/L, mean $\pm$ SD                    | 68.65 $\pm$ 7.60   | 67.18 $\pm$ 8.38   | 66.23 $\pm$ 8.54    | <0.001 | 70.10 $\pm$ 9.25   | 67.45 $\pm$ 9.05    | 66.52 $\pm$ 8.52    | <0.001 |
| Creatinine, mmol/L, mean $\pm$ SD                    | 70.27 $\pm$ 29.53  | 69.35 $\pm$ 32.49  | 72.57 $\pm$ 65.81   | 0.245  | 77.39 $\pm$ 21.77  | 81.50 $\pm$ 32.45   | 82.34 $\pm$ 54.89   | 0.177  |
| Albumin, g/L, mean $\pm$ SD                          | 40.40 $\pm$ 13.59  | 38.42 $\pm$ 5.28   | 37.20 $\pm$ 6.16    | <0.001 | 42.82 $\pm$ 26.50  | 38.88 $\pm$ 6.09    | 37.29 $\pm$ 7.07    | 0.001  |
| Urea nitrogen, mmol/L, mean $\pm$ SD                 | 7.42 $\pm$ 27.55   | 5.99 $\pm$ 14.30   | 6.88 $\pm$ 19.05    | 0.298  | 5.89 $\pm$ 11.90   | 7.35 $\pm$ 25.14    | 8.03 $\pm$ 29.23    | 0.446  |
| Prealbumin, mg/L, mean $\pm$ SD                      | 224.36 $\pm$ 75.98 | 205.04 $\pm$ 87.04 | 187.76 $\pm$ 81.67  | <0.001 | 218.41 $\pm$ 82.02 | 196.79 $\pm$ 80.58  | 173.89 $\pm$ 79.59  | <0.001 |
| Total bilirubin, $\mu$ mol/L, mean $\pm$ SD          | 13.76 $\pm$ 14.14  | 14.87 $\pm$ 21.22  | 14.24 $\pm$ 13.79   | 0.222  | 13.31 $\pm$ 12.13  | 12.92 $\pm$ 11.24   | 13.80 $\pm$ 21.03   | 0.812  |
| Direct bilirubin, $\mu$ mol/L, mean $\pm$ SD         | 4.01 $\pm$ 7.58    | 5.10 $\pm$ 12.91   | 5.21 $\pm$ 10.52    | 0.003  | 4.64 $\pm$ 7.54    | 4.35 $\pm$ 5.19     | 6.12 $\pm$ 16.55    | 0.125  |
| Transferrin, g/L, mean $\pm$ SD                      | 6.57 $\pm$ 31.69   | 6.60 $\pm$ 31.79   | 6.21 $\pm$ 28.86    | 0.958  | 9.23 $\pm$ 39.27   | 3.80 $\pm$ 12.96    | 6.17 $\pm$ 29.19    | 0.094  |
| C-reactive protein, mg/L, mean $\pm$ SD              | 15.16 $\pm$ 29.14  | 19.96 $\pm$ 35.11  | 28.00 $\pm$ 47.25   | <0.001 | 14.43 $\pm$ 27.54  | 21.46 $\pm$ 37.36   | 27.17 $\pm$ 45.69   | <0.001 |
| Cholesterol, mmol/L, mean $\pm$ SD                   | 4.96 $\pm$ 3.58    | 4.73 $\pm$ 1.81    | 4.67 $\pm$ 1.88     | 0.026  | 5.03 $\pm$ 4.48    | 4.61 $\pm$ 1.20     | 4.58 $\pm$ 1.43     | 0.137  |
| Glucose, mmol/L, mean $\pm$ SD                       | 5.71 $\pm$ 2.55    | 5.73 $\pm$ 2.37    | 5.77 $\pm$ 2.56     | 0.862  | 5.76 $\pm$ 3.62    | 5.51 $\pm$ 1.55     | 5.59 $\pm$ 2.00     | 0.492  |
| Triglycerides, mmol/L, mean $\pm$ SD                 | 1.60 $\pm$ 1.17    | 1.50 $\pm$ 1.33    | 1.41 $\pm$ 0.79     | <0.001 | 1.51 $\pm$ 1.21    | 1.41 $\pm$ 0.62     | 1.45 $\pm$ 1.01     | 0.462  |
| AST, U/L, mean $\pm$ SD                              | 27.25 $\pm$ 21.58  | 28.51 $\pm$ 29.28  | 28.25 $\pm$ 27.96   | 0.386  | 26.11 $\pm$ 26.52  | 27.62 $\pm$ 38.34   | 31.55 $\pm$ 61.95   | 0.285  |
| HDL-C, mmol/L, mean $\pm$ SD                         | 1.27 $\pm$ 0.65    | 1.22 $\pm$ 0.43    | 1.20 $\pm$ 0.48     | 0.011  | 1.24 $\pm$ 0.36    | 1.22 $\pm$ 0.36     | 1.18 $\pm$ 0.36     | 0.090  |
| ALT, U/L, mean $\pm$ SD                              | 26.00 $\pm$ 26.96  | 24.85 $\pm$ 26.64  | 25.34 $\pm$ 28.54   | 0.550  | 28.44 $\pm$ 44.99  | 23.75 $\pm$ 38.97   | 24.53 $\pm$ 38.95   | 0.310  |
| LDL-C, mmol/L, mean $\pm$ SD                         | 2.94 $\pm$ 1.00    | 2.91 $\pm$ 1.12    | 2.82 $\pm$ 1.10     | 0.036  | 3.02 $\pm$ 1.13    | 2.96 $\pm$ 1.00     | 2.87 $\pm$ 1.08     | 0.258  |
| Hemoglobin, g/L, mean $\pm$ SD                       | 125.39 $\pm$ 21.94 | 118.72 $\pm$ 25.54 | 114.23 $\pm$ 23.26  | <0.001 | 130.03 $\pm$ 24.43 | 122.05 $\pm$ 26.44  | 115.94 $\pm$ 24.36  | <0.001 |
| White blood cells, 10 <sup>9</sup> /L, mean $\pm$ SD | 6.20 $\pm$ 3.30    | 6.40 $\pm$ 3.03    | 6.90 $\pm$ 3.71     | <0.001 | 6.52 $\pm$ 2.73    | 6.75 $\pm$ 2.96     | 7.05 $\pm$ 3.09     | 0.087  |
| Neutrophils, 10 <sup>9</sup> /L, mean $\pm$ SD       | 5.32 $\pm$ 9.52    | 5.56 $\pm$ 9.84    | 6.49 $\pm$ 10.60    | 0.021  | 5.14 $\pm$ 8.20    | 5.08 $\pm$ 6.62     | 5.69 $\pm$ 7.65     | 0.615  |
| Lymphocytes, 10 <sup>9</sup> /L, mean $\pm$ SD       | 2.09 $\pm$ 4.11    | 1.85 $\pm$ 3.13    | 1.92 $\pm$ 4.00     | 0.235  | 2.15 $\pm$ 4.57    | 1.64 $\pm$ 1.01     | 1.82 $\pm$ 4.54     | 0.244  |
| Red blood cells, 10 <sup>12</sup> /L, mean $\pm$ SD  | 4.43 $\pm$ 3.57    | 4.16 $\pm$ 0.63    | 4.12 $\pm$ 1.64     | 0.006  | 4.43 $\pm$ 0.71    | 4.29 $\pm$ 0.76     | 4.35 $\pm$ 3.18     | 0.634  |
| Platelets, 10 <sup>9</sup> /L, mean $\pm$ SD         | 214.87 $\pm$ 84.34 | 232.58 $\pm$ 99.35 | 236.10 $\pm$ 102.23 | <0.001 | 227.24 $\pm$ 90.94 | 249.87 $\pm$ 102.34 | 250.58 $\pm$ 107.71 | 0.003  |



SD, standard deviation; COPD, chronic obstructive pulmonary disease; ICU, intensive care unit; KPS, the Karnofsky Performance Score; BMI, body mass index; PG-SGA, the Patient-Generated Subjective Global Assessment; NRS 2002, the Nutrition Risk Screening 2002; AST, aspartate aminotransferase; HDL-C, high density lipoprotein cholesterol; ALT, alanine transaminase; LDL-C, low density lipoprotein cholesterol.

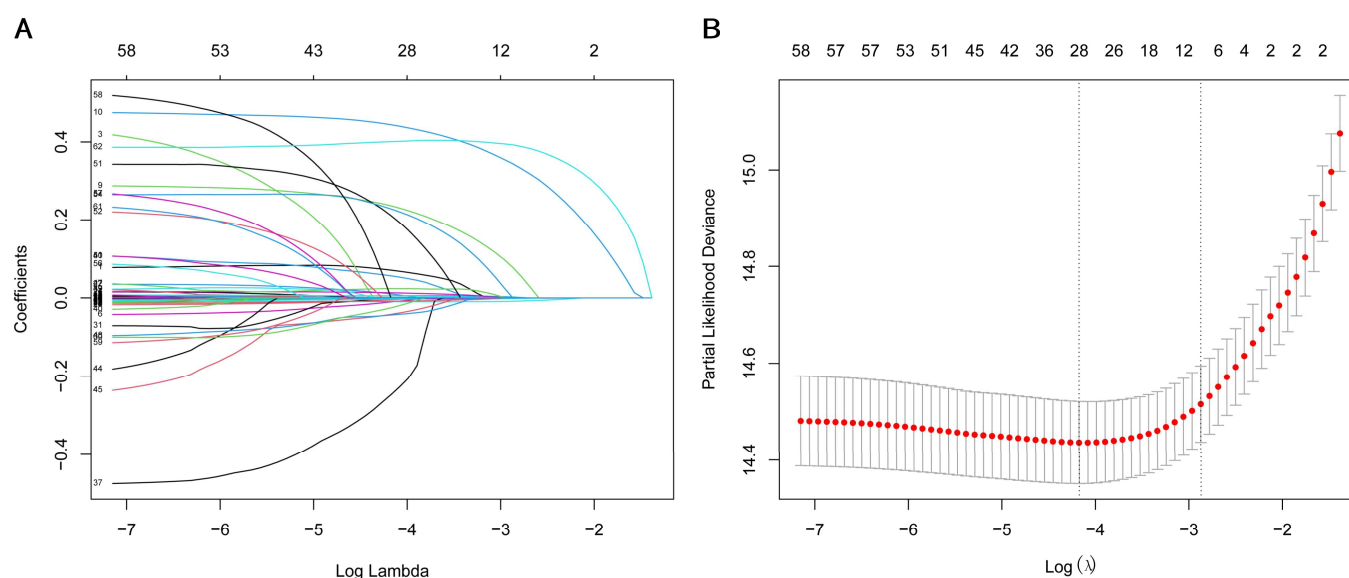

**Figure S3.** LASSO regression was used for dimension reduction.

**Table S3.** Univariate Cox Regression Analysis of the Association of the BMI, PGSGA and NRS2002 score with Overall Survival.

| Characteristics                          | HR (95%CI)       | <i>P</i> |
|------------------------------------------|------------------|----------|
| BMI, categorical                         |                  |          |
| Underweight (<18.5 kg/m <sup>2</sup> )   | reference        | -        |
| Normal (18.5-23.9, kg/m <sup>2</sup> )   | 0.67 (0.58-0.78) | <0.001   |
| Overweight (24-27.9, kg/m <sup>2</sup> ) | 0.63 (0.53-0.74) | <0.001   |
| Obesity (≥28 kg/m <sup>2</sup> )         | 0.53 (0.40-0.70) | <0.001   |
| BMI, kg/m <sup>2</sup>                   | 0.96 (0.94-0.97) | <0.001   |
| PGSGA score (≥4 vs <4)                   | 1.36 (1.22-1.51) | <0.001   |
| NRS2002 score (≥3 vs <3)                 | 1.34 (1.21-1.49) | <0.001   |

BMI, body mass index; PG-SGA, the Patient-Generated Subjective Global Assessment; NRS 2002, the Nutrition Risk Screening 2002; HR, hazard ratio; CI, confidence interval.
